# Supplementary material
Source: publisher figshare collection journal article supplement (https://tandf.figshare.com/ndownloader/files/43433187)
Supplement: Supplementary file 1 [file 43433187]

# Title: A Humane Costs of the 1970s and 1980s Famines in North Wollo, Ethiopia

The region Wollo in general and its northern side in particular is always prone to drought and famine. In this case North Wollo in the history of Ethiopia took the lead in famine occurrences and the costs in the afterward. Most of them are best remembered but not documented. Some of the aspects (socio-economic issues) are well stated by scholars but not the humane and related costs as the famine equally affected it. Hence looking over these gaps, the paper tries to address the challenges and effects on families and people of the region.

It would contribute for readers, other concerned body’s in any position and for the people. Therefore, in the case of constructing and or de/reconstructing the national history of the period, also for the misunderstanding on nature of famine and the costs paid, and inspired other academicians and policy makers for further investigation and looking for last long solution.
